# Supplementary material for: European UV DataBase (EUVDB) as a repository and quality analyser for solar spectral UV irradiance monitored in Sodankylä
Source: Copernicus journal article supplement (doi:10.5194/gi-5-333-2016), 2016-08-01
Supplement: Supplementary file 1 [file gi-5-333-2016-supplement.zip]

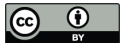

## *Supplement of*

# **European UV DataBase (EUVDB) as a repository and quality analyser for solar spectral UV irradiance monitored in Sodankylä**

**Anu Heikkilä et al.**

*Correspondence to:* Anu Heikkilä

- gi-5-333-2016-supplement-title-page.pdf
- atm\_signature.txt
- master\_flags.txt
- shift1\_flags.txt
- shift2\_flags.txt
- spike\_shape\_flags.txt
- start\_irr\_flags.txt
- transmission\_2\_flags.txt

The copyright of individual parts of the supplement might differ from the CC-BY 3.0 licence.
